# Supplementary material for: Cis-regulatory hubs: a new 3D model of complex disease genetics with an application to schizophrenia
Source: Life Sci Alliance. 2022 Jan 27;5(5):e202101156. doi: 10.26508/lsa.202101156 (PMC8807870; doi:10.26508/lsa.202101156)
Supplement: Supplementary file 3 [file LSA-2021-01156_TableS2.xlsx]

## Sheet: CRHs_ABC_subset_baseline
Category	Prop._SNPs	Prop._h2	Prop._h2_std_error	Enrichment	Enrichment_std_error	Enrichment_p	Coefficient	Coefficient_std_error	Coefficient_z-score
ALL_SNPs	1.78606	0.567094	0.00174739	0.317512	0.000978354	3.29218e-53	7.30287e-09	4.97827e-09	1.46695
DHS_peaks_Trynka	0.21735	0.0158891	0.0576325	0.0731038	0.26516	0.000547337	-6.39289e-08	6.00541e-08	-1.06452
DHS_Trynka	0.32621	0.0778341	0.0629973	0.238602	0.193119	9.69473e-05	-1.9473e-08	5.17352e-08	-0.376398
DHS_Trynka_extend_500	0.937314	0.509889	0.0398598	0.54399	0.0425255	7.31731e-18	7.53824e-08	1.93555e-08	3.89462
Enhancer_Andersson	0.00820472	-0.0115219	0.0120761	-1.4043	1.47185	0.105016	-8.43966e-08	2.16851e-07	-0.389192
Enhancer_Andersson_extend_500	0.0361378	-0.0242106	0.0164028	-0.66995	0.453896	0.000252892	-1.19226e-07	7.55361e-08	-1.5784
Enhancer_Hoffman	0.0808224	0.00417065	0.0272081	0.0516026	0.33664	0.00642924	-2.83233e-08	8.00241e-08	-0.353935
Enhancer_Hoffman_extend_500	0.169354	0.0402194	0.0314847	0.237486	0.18591	8.00942e-05	-5.5641e-08	5.56216e-08	-1.00035
H3K27ac_Hnisz	0.725317	0.263494	0.0228221	0.363282	0.031465	1.79524e-38	-1.04436e-08	6.18111e-08	-0.168961
H3K27ac_Hnisz_extend_500	0.78166	0.285781	0.0221571	0.365608	0.0283462	3.40771e-39	-2.09437e-08	6.03723e-08	-0.346909
H3K27ac_PGC2	0.501549	0.273375	0.0348672	0.54506	0.0695189	1.71826e-09	7.41962e-09	4.41501e-08	0.168054
H3K27ac_PGC2_extend_500	0.622282	0.339868	0.0280384	0.546164	0.0450574	7.67391e-17	4.60631e-08	3.98157e-08	1.15691
PromoterFlanking_Hoffman	0.0156792	0.0549787	0.0157304	3.50648	1.00327	0.0136219	4.17253e-07	1.60851e-07	2.59404
PromoterFlanking_Hoffman_extend_500	0.0613269	0.0595054	0.023079	0.970298	0.376327	0.936973	-6.41564e-08	7.07777e-08	-0.906449
Promoter_UCSC	0.0852092	0.0664082	0.0241451	0.779355	0.283363	0.434022	-3.19566e-08	1.47355e-07	-0.216868
Promoter_UCSC_extend_500	0.104647	0.074282	0.0188797	0.709837	0.180414	0.107665	1.92944e-09	1.24989e-07	0.0154369
SuperEnhancer_Hnisz	0.31336	0.119707	0.0172744	0.382012	0.0551263	1.64007e-21	3.47387e-08	1.78824e-07	0.194262
SuperEnhancer_Hnisz_extend_500	0.319079	0.121113	0.0173545	0.379571	0.0543892	7.56469e-22	-3.58202e-08	1.77925e-07	-0.201321
WeakEnhancer_Hoffman	0.0409036	-0.00759766	0.0241817	-0.185745	0.591188	0.0466556	-1.10229e-07	9.57457e-08	-1.15127
WeakEnhancer_Hoffman_extend_500	0.168041	0.10253	0.0298565	0.610151	0.177674	0.0275033	5.08059e-08	4.29891e-08	1.18183
CRNs_ABC	0.0327487	0.100964	0.0218719	3.08298	0.66787	0.0022278	4.0174e-07	1.66578e-07	2.41171
CRNs_ABC_extend_500	0.0564217	0.100388	0.0192367	1.77925	0.340945	0.0242342	-3.88779e-08	1.11427e-07	-0.348909

## Sheet: CRHs_Cand_ABC_subset_baseline
Category	Prop._SNPs	Prop._h2	Prop._h2_std_error	Enrichment	Enrichment_std_error	Enrichment_p	Coefficient	Coefficient_std_error	Coefficient_z-score
ALL_SNPs	1.78606	0.565274	0.00163924	0.316493	0.000917797	3.18244e-54	7.05911e-09	5.07883e-09	1.38991
DHS_peaks_Trynka	0.21735	0.00319893	0.0579672	0.0147179	0.2667	0.00025555	-5.50085e-08	6.0349e-08	-0.911505
DHS_Trynka	0.32621	0.0550325	0.0633287	0.168703	0.194135	2.39933e-05	-2.59454e-08	5.16408e-08	-0.50242
DHS_Trynka_extend_500	0.937314	0.493764	0.0401658	0.526786	0.0428521	9.36122e-19	6.92976e-08	1.97728e-08	3.5047
Enhancer_Andersson	0.00820472	-0.0117397	0.0120488	-1.43084	1.46852	0.100498	-6.61947e-08	2.18519e-07	-0.302924
Enhancer_Andersson_extend_500	0.0361378	-0.0272295	0.0163879	-0.75349	0.453482	0.000122209	-1.31815e-07	7.64461e-08	-1.72428
Enhancer_Hoffman	0.0808224	0.000903682	0.0270558	0.0111811	0.334756	0.00438109	-2.79463e-08	8.03553e-08	-0.347785
Enhancer_Hoffman_extend_500	0.169354	0.0437277	0.0311287	0.258203	0.183808	0.000104106	-4.11996e-08	5.48932e-08	-0.750541
H3K27ac_Hnisz	0.725317	0.263271	0.0227105	0.362974	0.0313111	1.05037e-38	-9.27322e-09	6.21259e-08	-0.149265
H3K27ac_Hnisz_extend_500	0.78166	0.286479	0.0221924	0.366501	0.0283914	1.16438e-39	-2.2277e-08	6.07024e-08	-0.366986
H3K27ac_PGC2	0.501549	0.275559	0.0348198	0.549415	0.0694245	2.39906e-09	1.09497e-08	4.46418e-08	0.24528
H3K27ac_PGC2_extend_500	0.622282	0.339861	0.0279128	0.546153	0.0448556	5.8851e-17	4.34266e-08	4.01861e-08	1.08064
PromoterFlanking_Hoffman	0.0156792	0.0578466	0.0156376	3.6894	0.997346	0.00787878	3.90919e-07	1.62817e-07	2.40097
PromoterFlanking_Hoffman_extend_500	0.0613269	0.0774721	0.0226245	1.26326	0.368916	0.473384	3.25707e-09	7.11119e-08	0.0458021
Promoter_UCSC	0.0852092	0.0715434	0.0242723	0.83962	0.284856	0.571884	1.92324e-08	1.47344e-07	0.130527
Promoter_UCSC_extend_500	0.104647	0.083178	0.019411	0.794847	0.185491	0.267482	1.54042e-08	1.24414e-07	0.123813
SuperEnhancer_Hnisz	0.31336	0.118179	0.0170891	0.377134	0.0545353	6.6958e-22	-1.18542e-08	1.79355e-07	-0.0660936
SuperEnhancer_Hnisz_extend_500	0.319079	0.121668	0.017236	0.381311	0.054018	6.46784e-22	1.07654e-08	1.78511e-07	0.0603067
WeakEnhancer_Hoffman	0.0409036	-0.002692	0.0246162	-0.0658131	0.601809	0.0779881	-7.8878e-08	9.73908e-08	-0.809913
WeakEnhancer_Hoffman_extend_500	0.168041	0.101322	0.0297958	0.602961	0.177313	0.0245479	4.29074e-08	4.31041e-08	0.995437
Cand_CRNs_ABC	0.228782	0.0642655	0.0120975	0.280902	0.0528779	6.14187e-25	-9.6668e-08	5.24376e-08	-1.84349
Cand_CRNs_ABC_extend_500	0.301736	0.158521	0.0284281	0.525364	0.0942153	2.33146e-06	9.38282e-08	5.30796e-08	1.76769

## Sheet: CRHs_DNAse_subset_baseline
Category	Prop._SNPs	Prop._h2	Prop._h2_std_error	Enrichment	Enrichment_std_error	Enrichment_p	Coefficient	Coefficient_std_error	Coefficient_z-score
ALL_SNPs	1.78606	0.566085	0.00173044	0.316947	0.000968862	7.47031e-53	7.0813e-09	4.99837e-09	1.41672
DHS_peaks_Trynka	0.21735	0.0133023	0.0578848	0.0612024	0.266321	0.000475163	-5.4442e-08	6.03827e-08	-0.901617
DHS_Trynka	0.32621	0.0696269	0.0631646	0.213442	0.193632	5.76145e-05	-2.08078e-08	5.16849e-08	-0.40259
DHS_Trynka_extend_500	0.937314	0.501977	0.0396159	0.535548	0.0422654	1.94636e-18	7.31442e-08	1.92961e-08	3.79063
Enhancer_Andersson	0.00820472	-0.0109972	0.0121577	-1.34035	1.48179	0.116543	-5.64168e-08	2.18468e-07	-0.258238
Enhancer_Andersson_extend_500	0.0361378	-0.027003	0.0164509	-0.747223	0.455225	0.000132283	-1.30886e-07	7.59453e-08	-1.72343
Enhancer_Hoffman	0.0808224	-0.00274563	0.027062	-0.0339712	0.334833	0.00294245	-3.49791e-08	8.01696e-08	-0.436314
Enhancer_Hoffman_extend_500	0.169354	0.0383313	0.0314508	0.226338	0.18571	6.11088e-05	-4.26429e-08	5.50536e-08	-0.774571
H3K27ac_Hnisz	0.725317	0.260763	0.0229224	0.359516	0.0316032	1.55882e-38	-8.30767e-09	6.17254e-08	-0.134591
H3K27ac_Hnisz_extend_500	0.78166	0.282996	0.0222618	0.362045	0.0284802	3.32356e-39	-2.34008e-08	6.03196e-08	-0.387947
H3K27ac_PGC2	0.501549	0.267347	0.0349417	0.533043	0.0696675	8.14357e-10	5.32332e-09	4.43516e-08	0.120026
H3K27ac_PGC2_extend_500	0.622282	0.335351	0.0280614	0.538906	0.0450944	3.50861e-17	4.65943e-08	3.99986e-08	1.1649
PromoterFlanking_Hoffman	0.0156792	0.0563653	0.0156079	3.59492	0.995457	0.0100979	3.90279e-07	1.61506e-07	2.41651
PromoterFlanking_Hoffman_extend_500	0.0613269	0.0720524	0.0226653	1.17489	0.369581	0.634807	-7.30115e-09	7.06549e-08	-0.103335
Promoter_UCSC	0.0852092	0.0677104	0.0247397	0.794637	0.290341	0.477374	2.42705e-08	1.46544e-07	0.16562
Promoter_UCSC_extend_500	0.104647	0.0780895	0.0196396	0.746221	0.187676	0.175484	5.87841e-10	1.22683e-07	0.00479155
SuperEnhancer_Hnisz	0.31336	0.116576	0.0170775	0.372019	0.0544982	2.99443e-22	-5.2413e-09	1.79824e-07	-0.0291468
SuperEnhancer_Hnisz_extend_500	0.319079	0.119749	0.017205	0.375295	0.0539208	3.21713e-22	4.10412e-09	1.79006e-07	0.0229273
WeakEnhancer_Hoffman	0.0409036	-0.00187378	0.0245423	-0.0458097	0.600002	0.0829018	-8.38494e-08	9.66939e-08	-0.867163
WeakEnhancer_Hoffman_extend_500	0.168041	0.105879	0.0298332	0.630079	0.177536	0.0362308	5.22633e-08	4.26846e-08	1.22441
CRNs_DNAse	0.00568974	0.0170074	0.0104022	2.98913	1.82823	0.278673	1.02604e-07	4.138e-07	0.247956
CRNs_DNAse_extend_500	0.00982799	0.0257895	0.00853056	2.62409	0.867987	0.0655309	1.78131e-07	2.51291e-07	0.708863

## Sheet: CRHs_Cand_DNAse_subset_baseline
Category	Prop._SNPs	Prop._h2	Prop._h2_std_error	Enrichment	Enrichment_std_error	Enrichment_p	Coefficient	Coefficient_std_error	Coefficient_z-score
ALL_SNPs	1.78606	0.56631	0.00160391	0.317073	0.00089802	6.64878e-53	6.64624e-09	4.97506e-09	1.33591
DHS_peaks_Trynka	0.21735	0.0265925	0.0578113	0.122349	0.265983	0.00104029	-4.97825e-08	6.07616e-08	-0.819309
DHS_Trynka	0.32621	0.0858361	0.0618096	0.263132	0.189478	0.00011555	-8.40579e-09	5.08993e-08	-0.165145
DHS_Trynka_extend_500	0.937314	0.47092	0.0396747	0.502414	0.0423281	2.80212e-20	5.61211e-08	1.9031e-08	2.94893
Enhancer_Andersson	0.00820472	-0.0128345	0.0117514	-1.56429	1.43227	0.0763109	-9.2612e-08	2.1392e-07	-0.432927
Enhancer_Andersson_extend_500	0.0361378	-0.0279614	0.0166099	-0.773744	0.459627	0.000146988	-1.29198e-07	7.7763e-08	-1.66143
Enhancer_Hoffman	0.0808224	0.00474474	0.026588	0.0587058	0.328968	0.00584643	-2.27299e-08	7.90511e-08	-0.287534
Enhancer_Hoffman_extend_500	0.169354	0.0428752	0.0313821	0.253168	0.185304	0.000111302	-3.95903e-08	5.48636e-08	-0.721614
H3K27ac_Hnisz	0.725317	0.255039	0.0226546	0.351624	0.031234	4.72209e-39	9.82883e-09	6.03746e-08	0.162797
H3K27ac_Hnisz_extend_500	0.78166	0.267372	0.0222303	0.342057	0.0284398	5.62441e-41	-4.34008e-08	5.89322e-08	-0.736454
H3K27ac_PGC2	0.501549	0.266082	0.0352401	0.530521	0.0702624	7.2586e-10	2.33441e-08	4.5505e-08	0.513001
H3K27ac_PGC2_extend_500	0.622282	0.314133	0.0284553	0.504808	0.0457274	5.02638e-19	2.57173e-08	4.08753e-08	0.629165
PromoterFlanking_Hoffman	0.0156792	0.0515563	0.016085	3.28821	1.02588	0.0278673	3.48594e-07	1.66654e-07	2.09172
PromoterFlanking_Hoffman_extend_500	0.0613269	0.069487	0.0227574	1.13306	0.371084	0.718881	6.45145e-09	7.14111e-08	0.0903424
Promoter_UCSC	0.0852092	0.052952	0.0239451	0.621435	0.281016	0.173048	4.75357e-08	1.45297e-07	0.327162
Promoter_UCSC_extend_500	0.104647	0.0559431	0.0191797	0.53459	0.18328	0.0105803	-4.14354e-08	1.22777e-07	-0.337485
SuperEnhancer_Hnisz	0.31336	0.117328	0.0179026	0.374418	0.0571311	2.11093e-21	4.34778e-09	1.76976e-07	0.024567
SuperEnhancer_Hnisz_extend_500	0.319079	0.119438	0.01738	0.374322	0.0544693	1.28703e-22	-4.08933e-09	1.74875e-07	-0.0233843
WeakEnhancer_Hoffman	0.0409036	0.00447589	0.0237436	0.109425	0.580477	0.126205	-5.67355e-08	9.40509e-08	-0.603243
WeakEnhancer_Hoffman_extend_500	0.168041	0.0990051	0.0297774	0.589174	0.177204	0.0199621	3.64134e-08	4.25745e-08	0.855288
Cand_CRNs_DNAse	0.687756	0.29954	0.0146655	0.435532	0.0213237	8.47044e-36	-8.20881e-08	5.83842e-08	-1.406
Cand_CRNs_DNAse_extend_500	0.747244	0.370096	0.0234381	0.49528	0.031366	1.30174e-26	1.05717e-07	6.02724e-08	1.75399

## Sheet: CRHs_Rao_subset_baseline
Category	Prop._SNPs	Prop._h2	Prop._h2_std_error	Enrichment	Enrichment_std_error	Enrichment_p	Coefficient	Coefficient_std_error	Coefficient_z-score
ALL_SNPs	1.78606	0.565408	0.00168053	0.316568	0.000940917	5.53467e-53	6.83133e-09	5.02506e-09	1.35945
DHS_peaks_Trynka	0.21735	0.0130068	0.0579563	0.0598426	0.266649	0.000478203	-5.39423e-08	6.05922e-08	-0.890251
DHS_Trynka	0.32621	0.0695182	0.0632998	0.213109	0.194046	5.96854e-05	-1.96945e-08	5.17749e-08	-0.380388
DHS_Trynka_extend_500	0.937314	0.500719	0.0397926	0.534207	0.0424538	2.23151e-18	7.31501e-08	1.93649e-08	3.77745
Enhancer_Andersson	0.00820472	-0.0112466	0.012188	-1.37075	1.48548	0.112803	-5.84218e-08	2.18458e-07	-0.267428
Enhancer_Andersson_extend_500	0.0361378	-0.0276389	0.0164684	-0.764818	0.455711	0.000115121	-1.32089e-07	7.57053e-08	-1.74478
Enhancer_Hoffman	0.0808224	-0.00258289	0.0271282	-0.0319576	0.335652	0.00307485	-3.22115e-08	7.98193e-08	-0.403555
Enhancer_Hoffman_extend_500	0.169354	0.0369103	0.0316748	0.217947	0.187033	5.86315e-05	-4.25885e-08	5.49766e-08	-0.774665
H3K27ac_Hnisz	0.725317	0.259487	0.0230891	0.357757	0.0318331	2.92176e-38	-6.56159e-09	6.17311e-08	-0.106293
H3K27ac_Hnisz_extend_500	0.78166	0.280921	0.0223055	0.35939	0.0285361	4.20997e-39	-2.5251e-08	6.03333e-08	-0.418524
H3K27ac_PGC2	0.501549	0.265649	0.0349208	0.529656	0.0696258	6.75424e-10	6.76654e-09	4.43332e-08	0.152629
H3K27ac_PGC2_extend_500	0.622282	0.33208	0.0281382	0.53365	0.0452178	2.50234e-17	4.47339e-08	3.99741e-08	1.11907
PromoterFlanking_Hoffman	0.0156792	0.0564388	0.0156669	3.5996	0.99922	0.0102345	3.86706e-07	1.6184e-07	2.38943
PromoterFlanking_Hoffman_extend_500	0.0613269	0.072821	0.0227196	1.18742	0.370466	0.611521	-5.78029e-10	7.06584e-08	-0.00818061
Promoter_UCSC	0.0852092	0.0654583	0.0246752	0.768207	0.289584	0.421147	2.76853e-08	1.46494e-07	0.188986
Promoter_UCSC_extend_500	0.104647	0.0759056	0.0195102	0.725352	0.186439	0.14004	3.41699e-09	1.22951e-07	0.0277914
SuperEnhancer_Hnisz	0.31336	0.115298	0.0168539	0.367942	0.0537844	9.81303e-23	-1.28426e-08	1.7971e-07	-0.071463
SuperEnhancer_Hnisz_extend_500	0.319079	0.118691	0.0170386	0.371981	0.0533992	1.39953e-22	1.14202e-08	1.79035e-07	0.0637875
WeakEnhancer_Hoffman	0.0409036	-0.00165362	0.0246653	-0.0404272	0.60301	0.0861155	-8.26396e-08	9.7031e-08	-0.851682
WeakEnhancer_Hoffman_extend_500	0.168041	0.105569	0.029971	0.628235	0.178356	0.0361995	5.2829e-08	4.27506e-08	1.23575
CRNs_Rao	0.0253387	0.0214639	0.00899599	0.847079	0.35503	0.666349	-4.13498e-08	3.39187e-07	-0.121908
CRNs_Rao_extend_500	0.0284675	0.0254262	0.00876084	0.893166	0.307749	0.727588	9.21018e-08	3.173e-07	0.290267

## Sheet: CRHs_Cand_Rao_subset_baseline
Category	Prop._SNPs	Prop._h2	Prop._h2_std_error	Enrichment	Enrichment_std_error	Enrichment_p	Coefficient	Coefficient_std_error	Coefficient_z-score
ALL_SNPs	1.78606	0.56649	0.00165319	0.317174	0.000925609	2.44813e-52	7.73676e-09	5.00051e-09	1.5472
DHS_peaks_Trynka	0.21735	0.0306233	0.0582376	0.140894	0.267944	0.00143178	-4.27062e-08	6.08439e-08	-0.701897
DHS_Trynka	0.32621	0.0867376	0.0623307	0.265895	0.191076	0.000135972	-1.23582e-08	5.10549e-08	-0.242057
DHS_Trynka_extend_500	0.937314	0.47859	0.0396459	0.510598	0.0422974	8.261e-20	6.10947e-08	1.89043e-08	3.23179
Enhancer_Andersson	0.00820472	-0.0133978	0.0118907	-1.63294	1.44925	0.0716961	-1.06964e-07	2.14397e-07	-0.498907
Enhancer_Andersson_extend_500	0.0361378	-0.0279912	0.0167871	-0.774568	0.464531	0.000161505	-1.25419e-07	7.7647e-08	-1.61524
Enhancer_Hoffman	0.0808224	0.00212933	0.0267292	0.0263458	0.330715	0.00466229	-2.73843e-08	7.90042e-08	-0.346619
Enhancer_Hoffman_extend_500	0.169354	0.0408258	0.0316885	0.241067	0.187113	9.60049e-05	-3.87387e-08	5.48924e-08	-0.70572
H3K27ac_Hnisz	0.725317	0.256486	0.0228607	0.353619	0.0315182	5.05572e-39	2.56135e-09	6.07438e-08	0.0421663
H3K27ac_Hnisz_extend_500	0.78166	0.271974	0.0224617	0.347944	0.0287359	2.18668e-40	-3.56214e-08	5.92566e-08	-0.601139
H3K27ac_PGC2	0.501549	0.266541	0.035508	0.531434	0.0707966	9.27738e-10	1.85862e-08	4.53885e-08	0.409491
H3K27ac_PGC2_extend_500	0.622282	0.319322	0.0287421	0.513146	0.0461883	1.18107e-18	3.01096e-08	4.08438e-08	0.737188
PromoterFlanking_Hoffman	0.0156792	0.0517773	0.0163439	3.3023	1.0424	0.029513	3.27656e-07	1.66623e-07	1.96645
PromoterFlanking_Hoffman_extend_500	0.0613269	0.0741591	0.0227069	1.20924	0.37026	0.570628	1.95664e-08	7.02939e-08	0.278352
Promoter_UCSC	0.0852092	0.066247	0.0251579	0.777463	0.295249	0.447712	7.49201e-08	1.4909e-07	0.502515
Promoter_UCSC_extend_500	0.104647	0.0705699	0.0202773	0.674364	0.193769	0.0901769	-3.11036e-08	1.24946e-07	-0.248936
SuperEnhancer_Hnisz	0.31336	0.118676	0.0184189	0.378721	0.0587787	3.76058e-20	-2.82576e-09	1.77646e-07	-0.0159067
SuperEnhancer_Hnisz_extend_500	0.319079	0.121244	0.0178961	0.379981	0.0560867	3.45074e-21	2.78203e-09	1.75591e-07	0.0158438
WeakEnhancer_Hoffman	0.0409036	0.00626465	0.0240761	0.153156	0.588604	0.151506	-5.69513e-08	9.41948e-08	-0.604612
WeakEnhancer_Hoffman_extend_500	0.168041	0.105975	0.0300934	0.630653	0.179084	0.0382028	4.67676e-08	4.25336e-08	1.09954
Cand_CRNs_Rao	0.661952	0.30841	0.0139824	0.465909	0.0211229	2.07222e-34	2.65283e-07	1.14786e-07	2.31111
Cand_CRNs_Rao_extend_500	0.672562	0.291748	0.0144578	0.433787	0.0214966	1.52479e-34	-2.48371e-07	1.15522e-07	-2.14999

## Sheet: Regul_ABC_subset_baseline
Category	Prop._SNPs	Prop._h2	Prop._h2_std_error	Enrichment	Enrichment_std_error	Enrichment_p	Coefficient	Coefficient_std_error	Coefficient_z-score
ALL_SNPs	1.78606	0.565833	0.00171763	0.316806	0.000961687	6.57187e-53	7.14233e-09	4.97431e-09	1.43584
DHS_peaks_Trynka	0.21735	0.0142924	0.0575449	0.0657575	0.264757	0.00048009	-6.13404e-08	6.0192e-08	-1.01908
DHS_Trynka	0.32621	0.0743821	0.0627163	0.228019	0.192258	7.17838e-05	-1.90492e-08	5.16841e-08	-0.368569
DHS_Trynka_extend_500	0.937314	0.504737	0.0396496	0.538494	0.0423013	2.66862e-18	7.36911e-08	1.93193e-08	3.81439
Enhancer_Andersson	0.00820472	-0.0112783	0.0120497	-1.37461	1.46862	0.108193	-7.43246e-08	2.1695e-07	-0.342589
Enhancer_Andersson_extend_500	0.0361378	-0.0255223	0.0163138	-0.706249	0.451432	0.000171529	-1.28993e-07	7.58134e-08	-1.70145
Enhancer_Hoffman	0.0808224	0.00185502	0.0269243	0.0229518	0.333129	0.00463193	-3.94108e-08	8.02351e-08	-0.491192
Enhancer_Hoffman_extend_500	0.169354	0.0430638	0.0312021	0.254282	0.184241	9.74782e-05	-4.29219e-08	5.55613e-08	-0.772515
H3K27ac_Hnisz	0.725317	0.262592	0.0227874	0.362038	0.0314171	2.23845e-38	-1.05711e-08	6.19401e-08	-0.170667
H3K27ac_Hnisz_extend_500	0.78166	0.285427	0.022268	0.365155	0.0284881	3.33981e-39	-2.11715e-08	6.0498e-08	-0.349953
H3K27ac_PGC2	0.501549	0.271466	0.0349543	0.541254	0.0696927	1.40316e-09	6.95484e-09	4.43576e-08	0.15679
H3K27ac_PGC2_extend_500	0.622282	0.338009	0.0278846	0.543177	0.0448102	3.99389e-17	4.6712e-08	3.98987e-08	1.17077
PromoterFlanking_Hoffman	0.0156792	0.0571668	0.015601	3.64604	0.995014	0.00874079	4.05508e-07	1.6204e-07	2.50253
PromoterFlanking_Hoffman_extend_500	0.0613269	0.0709072	0.0230235	1.15622	0.375422	0.676095	-1.29648e-08	7.16345e-08	-0.180985
Promoter_UCSC	0.0852092	0.059856	0.0247791	0.70246	0.290803	0.303387	3.03529e-08	1.47132e-07	0.206298
Promoter_UCSC_extend_500	0.104647	0.0683245	0.019706	0.652907	0.18831	0.0654844	-8.83732e-09	1.23246e-07	-0.0717045
SuperEnhancer_Hnisz	0.31336	0.118119	0.0172115	0.376943	0.0549259	5.96776e-22	8.51639e-10	1.79397e-07	0.00474723
SuperEnhancer_Hnisz_extend_500	0.319079	0.120866	0.0173125	0.378796	0.0542576	4.59342e-22	-2.91975e-09	1.78512e-07	-0.0163561
WeakEnhancer_Hoffman	0.0409036	-0.0061499	0.0240841	-0.150351	0.588802	0.0524397	-1.0667e-07	9.57903e-08	-1.11358
WeakEnhancer_Hoffman_extend_500	0.168041	0.103823	0.0296196	0.617843	0.176265	0.0294334	4.94967e-08	4.29261e-08	1.15307
Regul_ABC	0.0162726	0.0427593	0.0145299	2.62769	0.892908	0.0718668	3.17865e-07	1.86085e-07	1.70817
Regul_ABC_extend_500	0.0339811	0.0494083	0.0160634	1.45399	0.472714	0.338829	-1.55473e-08	1.12905e-07	-0.137703

## Sheet: Cand_Regul_ABC_subset_baseline
Category	Prop._SNPs	Prop._h2	Prop._h2_std_error	Enrichment	Enrichment_std_error	Enrichment_p	Coefficient	Coefficient_std_error	Coefficient_z-score
ALL_SNPs	1.78606	0.565091	0.00156966	0.316391	0.000878841	2.1013e-54	6.31677e-09	4.96412e-09	1.27249
DHS_peaks_Trynka	0.21735	0.00869383	0.056715	0.0399992	0.260939	0.000269619	-8.49444e-08	5.96466e-08	-1.42413
DHS_Trynka	0.32621	0.0742308	0.0621631	0.227556	0.190562	6.14401e-05	-3.15624e-08	5.16359e-08	-0.611249
DHS_Trynka_extend_500	0.937314	0.504562	0.038947	0.538306	0.0415517	8.84359e-19	7.2508e-08	1.94152e-08	3.7346
Enhancer_Andersson	0.00820472	-0.00999566	0.0119669	-1.21828	1.45854	0.130848	-4.21612e-08	2.17949e-07	-0.193445
Enhancer_Andersson_extend_500	0.0361378	-0.0259845	0.016249	-0.719039	0.449639	0.000146505	-1.3125e-07	7.61191e-08	-1.72427
Enhancer_Hoffman	0.0808224	0.00842813	0.0269564	0.10428	0.333526	0.00915745	-3.38537e-08	7.97959e-08	-0.424253
Enhancer_Hoffman_extend_500	0.169354	0.0516492	0.0308249	0.304977	0.182014	0.000227519	-4.06551e-08	5.46205e-08	-0.744319
H3K27ac_Hnisz	0.725317	0.267951	0.0224846	0.369426	0.0309997	8.34373e-39	-8.60209e-09	6.16836e-08	-0.139455
H3K27ac_Hnisz_extend_500	0.78166	0.289393	0.0218212	0.370229	0.0279165	4.21403e-40	-2.16215e-08	6.02525e-08	-0.358848
H3K27ac_PGC2	0.501549	0.282219	0.0343341	0.562695	0.068456	3.59418e-09	9.8069e-09	4.40934e-08	0.222412
H3K27ac_PGC2_extend_500	0.622282	0.344024	0.0276354	0.552843	0.0444098	6.64548e-17	4.37768e-08	3.98126e-08	1.09957
PromoterFlanking_Hoffman	0.0156792	0.0568368	0.0154047	3.62499	0.982496	0.00849502	4.16771e-07	1.61929e-07	2.57379
PromoterFlanking_Hoffman_extend_500	0.0613269	0.0724588	0.0222056	1.18152	0.362085	0.615014	-2.36142e-08	7.01793e-08	-0.336484
Promoter_UCSC	0.0852092	0.0768355	0.024195	0.901728	0.283948	0.728713	-1.37238e-08	1.4567e-07	-0.0942116
Promoter_UCSC_extend_500	0.104647	0.088265	0.0193718	0.843457	0.185116	0.396767	1.83469e-08	1.22929e-07	0.149248
SuperEnhancer_Hnisz	0.31336	0.119118	0.016762	0.380131	0.0534913	1.92485e-22	-5.21483e-09	1.78935e-07	-0.0291437
SuperEnhancer_Hnisz_extend_500	0.319079	0.122047	0.0168041	0.382499	0.0526644	9.87278e-23	4.66208e-09	1.77939e-07	0.0262005
WeakEnhancer_Hoffman	0.0409036	-0.00460569	0.0241903	-0.112598	0.591398	0.0612172	-1.0726e-07	9.606e-08	-1.1166
WeakEnhancer_Hoffman_extend_500	0.168041	0.100246	0.0291061	0.59656	0.173209	0.0194297	4.10034e-08	4.28394e-08	0.957141
Cand_Regul_ABC	0.0569944	0.175296	0.0309857	3.07568	0.543662	0.000171873	4.20504e-07	1.05329e-07	3.99227
Cand_Regul_ABC_extend_500	0.136759	0.181562	0.0328614	1.32761	0.240287	0.173715	-4.37537e-08	5.70714e-08	-0.766648

## Sheet: Regul_DNAse_subset_baseline
Category	Prop._SNPs	Prop._h2	Prop._h2_std_error	Enrichment	Enrichment_std_error	Enrichment_p	Coefficient	Coefficient_std_error	Coefficient_z-score
ALL_SNPs	1.78606	0.565811	0.00175751	0.316794	0.000984018	8.08283e-53	7.00356e-09	4.9943e-09	1.40231
DHS_peaks_Trynka	0.21735	0.0150548	0.0578753	0.0692653	0.266277	0.000527721	-5.4737e-08	6.0294e-08	-0.907835
DHS_Trynka	0.32621	0.0720654	0.0632225	0.220918	0.193809	6.77567e-05	-2.0643e-08	5.16274e-08	-0.399846
DHS_Trynka_extend_500	0.937314	0.502838	0.0396846	0.536467	0.0423387	2.30278e-18	7.32806e-08	1.93007e-08	3.79679
Enhancer_Andersson	0.00820472	-0.011028	0.0121324	-1.3441	1.4787	0.115222	-5.73187e-08	2.17866e-07	-0.263091
Enhancer_Andersson_extend_500	0.0361378	-0.0272758	0.0164736	-0.75477	0.455856	0.00012739	-1.32572e-07	7.58884e-08	-1.74693
Enhancer_Hoffman	0.0808224	-0.00174953	0.0271305	-0.0216466	0.335681	0.00335343	-3.40952e-08	8.01988e-08	-0.425134
Enhancer_Hoffman_extend_500	0.169354	0.0392369	0.0315166	0.231685	0.186099	7.08417e-05	-4.22469e-08	5.52117e-08	-0.76518
H3K27ac_Hnisz	0.725317	0.261219	0.022937	0.360144	0.0316233	1.73494e-38	-8.19606e-09	6.17947e-08	-0.132634
H3K27ac_Hnisz_extend_500	0.78166	0.283298	0.022244	0.362431	0.0284573	3.41315e-39	-2.36264e-08	6.03767e-08	-0.391317
H3K27ac_PGC2	0.501549	0.269155	0.0349798	0.536647	0.0697435	1.05765e-09	6.87026e-09	4.43836e-08	0.154793
H3K27ac_PGC2_extend_500	0.622282	0.335821	0.0280808	0.539661	0.0451255	3.67405e-17	4.58042e-08	4.00235e-08	1.14443
PromoterFlanking_Hoffman	0.0156792	0.0566698	0.0156072	3.61434	0.995409	0.0095928	3.92833e-07	1.62447e-07	2.41823
PromoterFlanking_Hoffman_extend_500	0.0613269	0.0727016	0.0227856	1.18548	0.371543	0.616278	-4.3359e-09	7.11938e-08	-0.0609028
Promoter_UCSC	0.0852092	0.0658623	0.0246329	0.772948	0.289088	0.429967	2.53801e-08	1.47066e-07	0.172575
Promoter_UCSC_extend_500	0.104647	0.0760359	0.0194549	0.726596	0.18591	0.140801	4.85454e-09	1.2305e-07	0.0394516
SuperEnhancer_Hnisz	0.31336	0.116749	0.0170848	0.372572	0.0545215	2.90464e-22	-9.50037e-09	1.79652e-07	-0.0528821
SuperEnhancer_Hnisz_extend_500	0.319079	0.120009	0.0172145	0.376112	0.0539506	3.15061e-22	8.30074e-09	1.78829e-07	0.0464173
WeakEnhancer_Hoffman	0.0409036	-0.00163562	0.0245187	-0.0399871	0.599426	0.0842736	-8.41481e-08	9.66249e-08	-0.870874
WeakEnhancer_Hoffman_extend_500	0.168041	0.106374	0.0297754	0.633024	0.177191	0.037308	5.2298e-08	4.26573e-08	1.22601
Regul_DNAse	0.00293771	0.0130725	0.00790257	4.44989	2.69005	0.204103	4.69483e-07	5.38214e-07	0.872298
Regul_DNAse_extend_500	0.00615458	0.0151651	0.00637532	2.46404	1.03587	0.162293	-2.76248e-09	2.83405e-07	-0.00974745

## Sheet: Cand_Regul_DNAse_subset_baselin
Category	Prop._SNPs	Prop._h2	Prop._h2_std_error	Enrichment	Enrichment_std_error	Enrichment_p	Coefficient	Coefficient_std_error	Coefficient_z-score
ALL_SNPs	1.78606	0.565469	0.00156274	0.316602	0.000874969	2.63341e-54	6.56896e-09	4.96665e-09	1.32261
DHS_peaks_Trynka	0.21735	0.00897278	0.0563707	0.0412826	0.259355	0.00025985	-9.00501e-08	5.95355e-08	-1.51255
DHS_Trynka	0.32621	0.077735	0.0616114	0.238298	0.188871	6.90057e-05	-2.80624e-08	5.19033e-08	-0.540667
DHS_Trynka_extend_500	0.937314	0.506368	0.0386551	0.540234	0.0412403	7.34166e-19	7.26903e-08	1.9383e-08	3.75021
Enhancer_Andersson	0.00820472	-0.0100002	0.0118653	-1.21884	1.44616	0.127414	-5.85136e-08	2.17502e-07	-0.269025
Enhancer_Andersson_extend_500	0.0361378	-0.0237905	0.0161458	-0.658326	0.446784	0.000232272	-1.27943e-07	7.64725e-08	-1.67307
Enhancer_Hoffman	0.0808224	0.0111772	0.0268616	0.138293	0.332354	0.0117428	-4.00132e-08	7.99622e-08	-0.500401
Enhancer_Hoffman_extend_500	0.169354	0.0543211	0.0305344	0.320754	0.180299	0.000280885	-4.25101e-08	5.50233e-08	-0.772583
H3K27ac_Hnisz	0.725317	0.268912	0.0223078	0.370751	0.030756	1.1119e-38	-1.09312e-08	6.17097e-08	-0.177138
H3K27ac_Hnisz_extend_500	0.78166	0.291162	0.0218002	0.372492	0.0278897	4.15721e-40	-1.95569e-08	6.02931e-08	-0.324364
H3K27ac_PGC2	0.501549	0.283281	0.0342346	0.564811	0.0682578	3.74858e-09	9.68114e-09	4.41279e-08	0.219388
H3K27ac_PGC2_extend_500	0.622282	0.345624	0.0274045	0.555414	0.0440387	6.47976e-17	4.5305e-08	3.97719e-08	1.13912
PromoterFlanking_Hoffman	0.0156792	0.0580139	0.0153467	3.70007	0.978794	0.00662393	4.35615e-07	1.62228e-07	2.68521
PromoterFlanking_Hoffman_extend_500	0.0613269	0.0707092	0.0221322	1.15299	0.360888	0.67052	-3.28866e-08	7.07516e-08	-0.464818
Promoter_UCSC	0.0852092	0.0671471	0.0237118	0.788026	0.278277	0.443638	-1.38884e-09	1.46007e-07	-0.00951217
Promoter_UCSC_extend_500	0.104647	0.0761182	0.0186622	0.727383	0.178335	0.125065	-7.29324e-10	1.23194e-07	-0.00592013
SuperEnhancer_Hnisz	0.31336	0.120312	0.0167536	0.383941	0.0534644	1.58988e-22	8.25148e-09	1.78441e-07	0.0462421
SuperEnhancer_Hnisz_extend_500	0.319079	0.122617	0.0168059	0.384284	0.0526699	6.46069e-23	-9.77176e-09	1.77443e-07	-0.0550698
WeakEnhancer_Hoffman	0.0409036	-0.00982116	0.0237051	-0.240105	0.579534	0.0334915	-1.32289e-07	9.50098e-08	-1.39237
WeakEnhancer_Hoffman_extend_500	0.168041	0.0971548	0.0289984	0.578163	0.172568	0.0142339	3.65548e-08	4.32125e-08	0.845933
Cand_Regul_DNAse	0.0710442	0.186814	0.0302919	2.62954	0.42638	0.000176445	3.65414e-07	8.81168e-08	4.14692
Cand_Regul_DNAse_extend_500	0.165176	0.200086	0.0349757	1.21135	0.211747	0.319375	-2.99723e-08	5.43775e-08	-0.55119

[truncated: 15 more sheets: Regul_Rao_subset_baseline, Cand_Regul_Rao_subset_baseline, Prom_ABC_subset_baseline, Cand_Prom_ABC_subset_baseline, Prom_DNAse_subset_baseline, Cand_Prom_DNAse_subset_baseline, Prom_Rao_subset_baseline, Cand_Prom_Rao_subset_baseline, Small_CRHs_ABC_subset_baseline, Small_CRNs_DNAse_subset_baselin, Small_CRHs_Rao_subset_baseline, Medium_CRHs_ABC_subset_baseline, Large_CRHs_ABC_subset_baseline, Large_CRHs_DNAse_subset_baselin, Large_CRHs_Rao_subset_baseline]
